# Supplementary material for: Visual detection of aflatoxin B1 and zearalenone via activating a new catalytic reaction of “naked” DNAzyme
Source: Royal Society of Chemistry journal article supplement (doi:10.1039/d2ra05683f), 2022-01-01
Supplement: d2ra05683f1.pdf [file d2ra05683f1.pdf]

1        **Electronic Supplementary Information (ESI) for**

2  
3        **A Label-free, Naked-Eye Detection of Aflatoxin B1 and**  
4        **Zearalenone Using “Naked” DNzyme**

5  
6        Qinrui Lu,<sup>a,b</sup> Yue Liu,<sup>b</sup> Qiao Liu,<sup>b</sup> Jun Liu,<sup>b</sup> Qin Yang,<sup>b</sup> Jiancai Tang,<sup>c</sup> Zhijun Meng,<sup>a</sup> Qiang Su,<sup>d,e</sup> Shengmao  
7        Li<sup>\*b</sup> and Yingping Luo<sup>\*a,b</sup>

8  
9        <sup>a</sup>Medical Imaging Key Laboratory of Sichuan Province, North Sichuan Medical College, Nanchong 637000, P.  
10        R. China. E-mail: [lyingping@163.com](mailto:lyingping@163.com)

11        <sup>b</sup>Department of Pharmacology, North Sichuan Medical College, Nanchong 637100, P. R. China. E-mail:  
12        [lsm9110@163.com](mailto:lsm9110@163.com); [lyingping@163.com](mailto:lyingping@163.com)

13        <sup>c</sup>Department of Basic Medical Sciences, North Sichuan Medical College, Nanchong 637100, P. R. China.

14        <sup>d</sup>Department of Pharmacy, The Second Clinical Medical College of North Sichuan Medical College, Nanchong  
15        Central Hospital, Nanchong 637000, P. R. China.

16        <sup>e</sup>Nanchong Key Laboratory of Individualized Drug Therapy, Nanchong 637000, P. R. China.

17        \*Corresponding Authors: [lsm9110@163.com](mailto:lsm9110@163.com) (S.L.); [lyingping@163.com](mailto:lyingping@163.com) (Y.L.). ORCID: 0000-0003-0525-  
18        7107

19  
20  
21

1 **Table S1** The sequences are listed in the electronic supplementary information

| <b>Name</b> | <b>Sequence (5'-3')</b>                                   |
|-------------|-----------------------------------------------------------|
| S.DNAzyme   | GGGCGGGTAGGGCGGG                                          |
| 1XAV        | TGAGGGTGGGTAGGGTGGGTAA                                    |
| 1XAV-2      | GGGTGGGTAGGGTGGG                                          |
| A1-1        | GGCACGTGTTGTCTCTCTGTGTCTCGTGCCTTTTTTAGACAACACGT<br>GCAGGG |
| D1-3        | ACAAGTGCGGGTAGGGCGGGAAGCACGTGTTGT                         |

2

3

4

5

6

7

8 **Table S2** The limit of detection (LOD) of AFB1 using S.DNAzyme in adlay, platyclade semen, tangerine peel  
9 and milk samples

|                 | <b>Adlay</b> | <b>Platycladi semen</b> | <b>Tangerine peel</b> | <b>Milk</b> |
|-----------------|--------------|-------------------------|-----------------------|-------------|
| <b>LOD (μM)</b> | 1.4          | 0.78                    | 1.17                  | 2.3         |

10

11

12

13

14

15

16

17 **Table S3** The limit of detection (LOD) of ZEN using S.DNAzyme in fritillaria cirrhosis bulbous, angelica  
18 sinensis, amygdalin, and rice samples

|                 | <b>Fritillariae cirrhosae bulbus</b> | <b>Angelica sinensis</b> | <b>Amygdalin</b> | <b>Rice</b> |
|-----------------|--------------------------------------|--------------------------|------------------|-------------|
| <b>LOD (μM)</b> | 1.29                                 | 1.32                     | 1.1              | 1.43        |

19

20

21

22

23

24

1 **Table S4** Comparison of S.DNAzyme-based assay to other assays for colorimetric AFB1 or ZEN detection

| Sensing element                                                    | Analytes                             | Label free | Enzyme free | Antibody free | LOD ( $\mu\text{M}$ )                          | Visual detection | Turnaround time (min) | Ref          |
|--------------------------------------------------------------------|--------------------------------------|------------|-------------|---------------|------------------------------------------------|------------------|-----------------------|--------------|
| S.DNAzyme                                                          | AFs (AFB1, AFB2, AFG1, AFM1) and ZEN | Yes        | Yes         | Yes           | 0.18 <sup>a</sup><br>0.29 <sup>b</sup>         | Yes              | 15                    | This work    |
| Hairpin DNA probe assisted by exonuclease III                      | AFB1                                 | Yes        | No          | Yes           | $1 \times 10^{-6}$                             | Yes              | > 60                  | <sup>1</sup> |
| Polystyrene dyed particles conjugated with aptamer                 | AFB1                                 | No         | Yes         | Yes           | 0.0146                                         | Yes              | 35                    | <sup>2</sup> |
| Magnetic nanoparticle conjugated with monoclonal antibody          | ZEN                                  | No         | No          | No            | $1.3 \times 10^{-4}$                           | No               | 45                    | <sup>3</sup> |
| AuNPs conjugated with antibody                                     | ZEN                                  | No         | Yes         | No            | NA                                             | Yes              | 15                    | <sup>4</sup> |
| AuNPs conjugated with antibody                                     | AFB1, OTA, ZEN                       | No         | Yes         | No            | $8.0 \times 10^{-4a}$<br>$3.1 \times 10^{-4b}$ | Yes              | 20                    | <sup>5</sup> |
| Different-colored AuNPs labeled with various monoclonal antibodies | ZEN, FB1, OTA, AFB1                  | No         | Yes         | No            | $1.9 \times 10^{-4a}$<br>$2.2 \times 10^{-3b}$ | Yes              | NA                    | <sup>6</sup> |
| Aptamer and AuNPs                                                  | ZEN                                  | Yes        | Yes         | Yes           | 0.031                                          | Yes              | 15                    | <sup>7</sup> |

2 OTA: ochratoxin, AFB1: fumonisin B1, <sup>a</sup>The LOD value of AFB1, <sup>b</sup>The LOD value of ZEN.

3

1

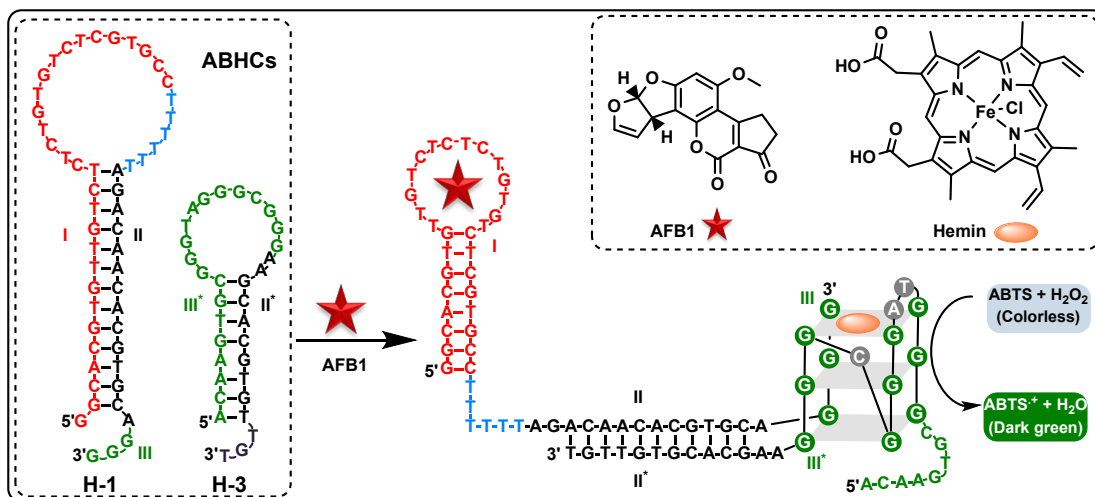

2

3 **Fig. S1** Design and prediction of two aptamer-based hairpin constructs (ABHCs) for AFB1 detection.

4

5

6

7

8

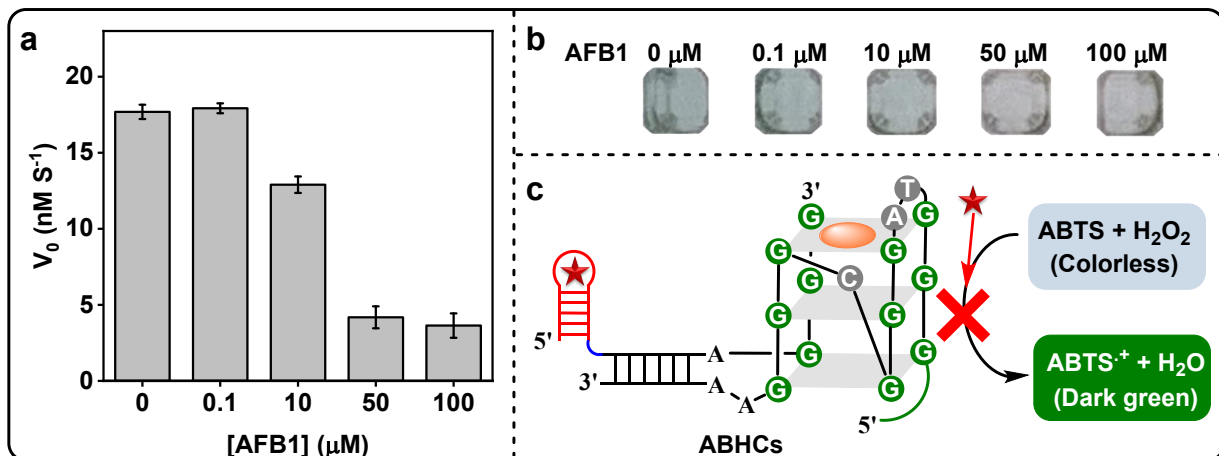

9

10 **Fig. S2** The catalytic activity of ABHCs, 500 nM H-1 and H-3, in presence of different concentration of AFB1.

11 (a) Reaction rates of ABHCs in terms of nanomolar  $\text{ABTS}^{+}$  produced per second. (b) Photographs of samples

12 containing 0–100  $\mu\text{M}$  AFB1 after 15 min of reaction. (c) Scheme for the predicted reaction between ABHCs and

13 AFB1.

14

15

16

1  
2

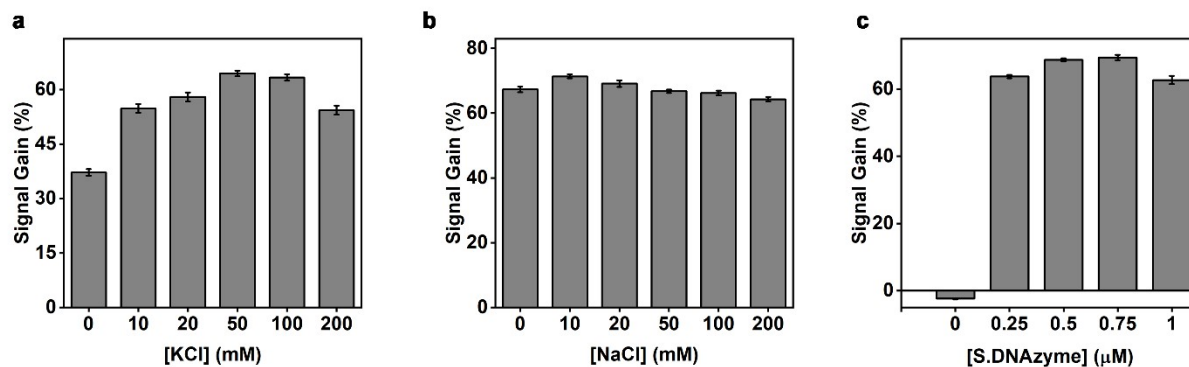

3  
4  
5  
6

**Fig. S3** Effects of (a) KCl, (b) NaCl and (c) S.DNAzyme concentration in reaction buffer on signal gain.

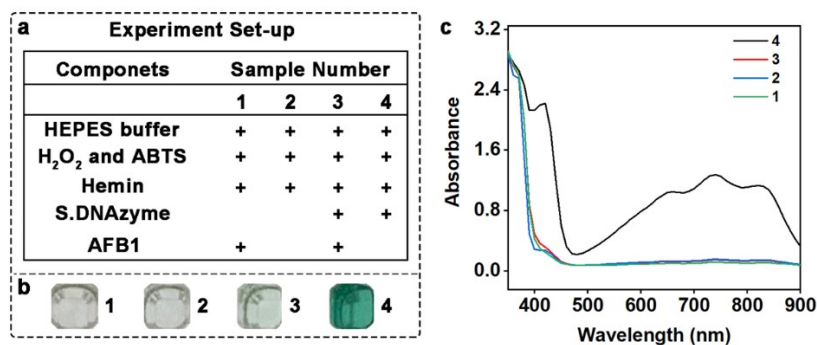

7  
8  
9  
10  
11  
12  
13  
14  
15

**Fig. S4** Feasibility of S.DNAzyme for detection of AFB1. Experimental setup exhibits (a) sample contents, (b) photographs depict the color of the samples after 15 min of reaction and absorbance spectra of samples containing 1) reaction buffer with AFB1, 2) reaction buffer alone, 3) reaction buffer with S.DNAzyme and AFB1; 4) reaction buffer with S.DNAzyme (S.DNAzyme alone).

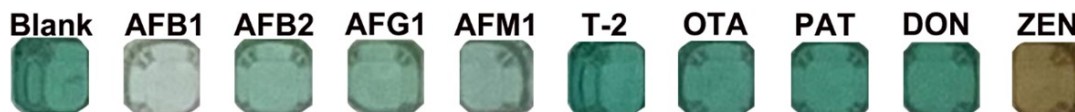

16  
17  
18  
19  
20

**Fig. S5** Photographs of samples that contained various interferents (100  $\mu$ M) after 15 minutes of reaction.

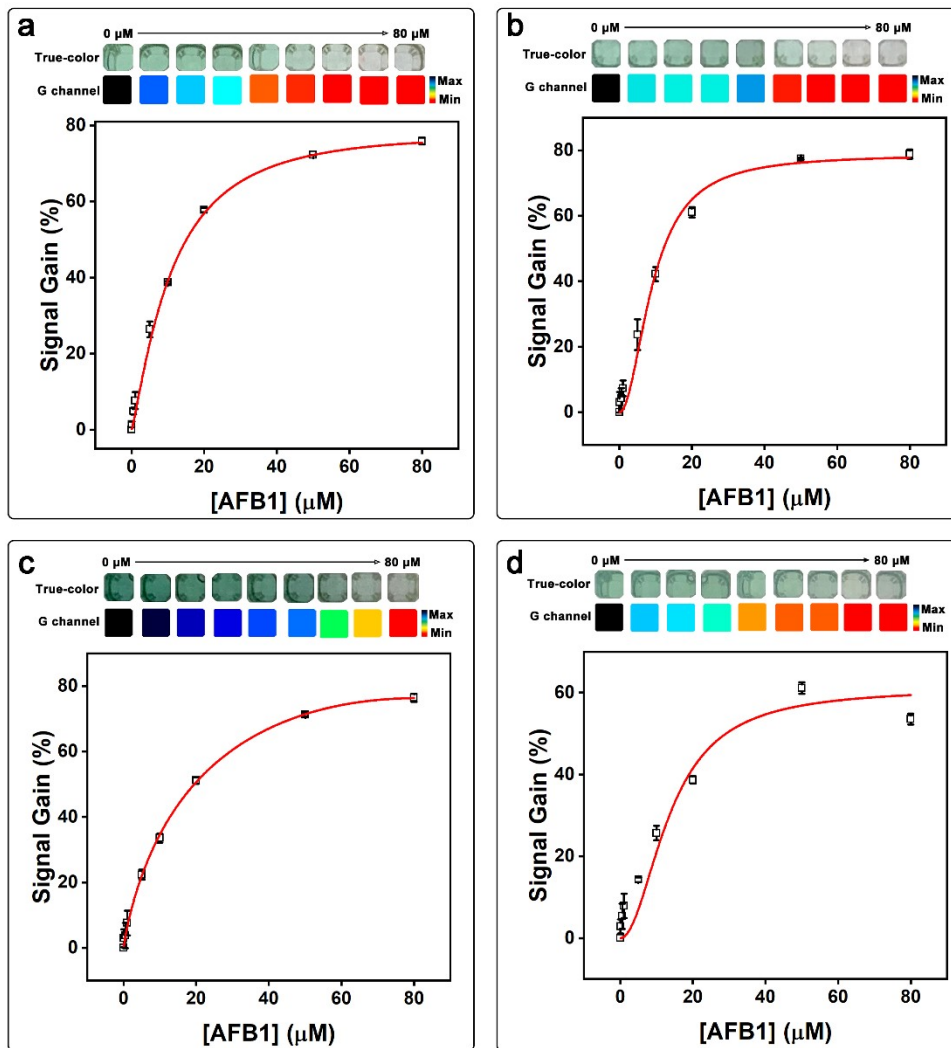

1

2 **Fig. S6** Calibration curve produced using 0-80 μM AFB1 in traditional Chinese medicine (TCM) and food  
 3 samples, including (a) adlay, (b) platyclade semen, (c) tangerine peel and (d) milk.

4

5

6

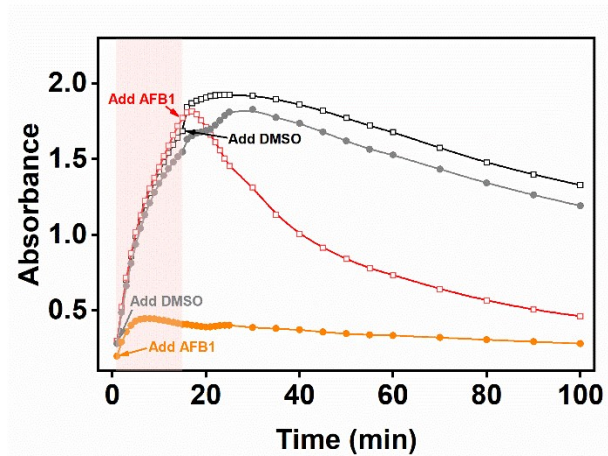

1

2 **Fig. S7** Absorbance changes of samples at 418 nm during 0-100 min. AFB1 was added at 0 (yellow line) and 15  
 3 min (red line), respectively. DMSO was used as a control and was added into the solution at 0 (gray line) and 15  
 4 min (black line), respectively.

5

6

7

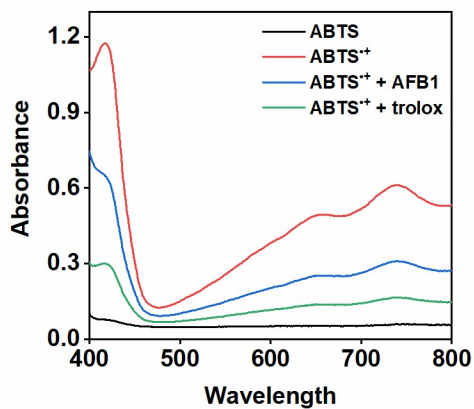

8

9 **Fig. S8** UV-VIS absorption spectra of ABTS (black line), ABTS<sup>+</sup> (red line), ABTS<sup>+</sup> incubated with AFB1  
 10 (ABTS<sup>+</sup> + AFB1, blue line) and ABTS<sup>+</sup> incubated with trolox (ABTS<sup>+</sup> + trolox, green line).

11

12

13

14

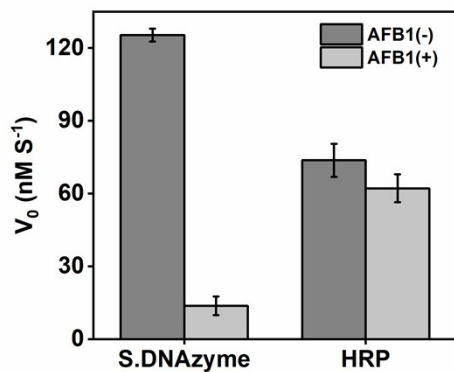

1  
2  
3  
4  
5  
6  
7

**Fig. S9** Reaction rates of S.DNAzyme and HRP incubated without AFB1 (AFB1 (-)) or with AFB1 (AFB1 (+)) in terms of nanomolar ABTS<sup>++</sup> produced per second. The concentration of S.DNAzyme and HRP was 0.75  $\mu$ M and 20 nM, respectively.

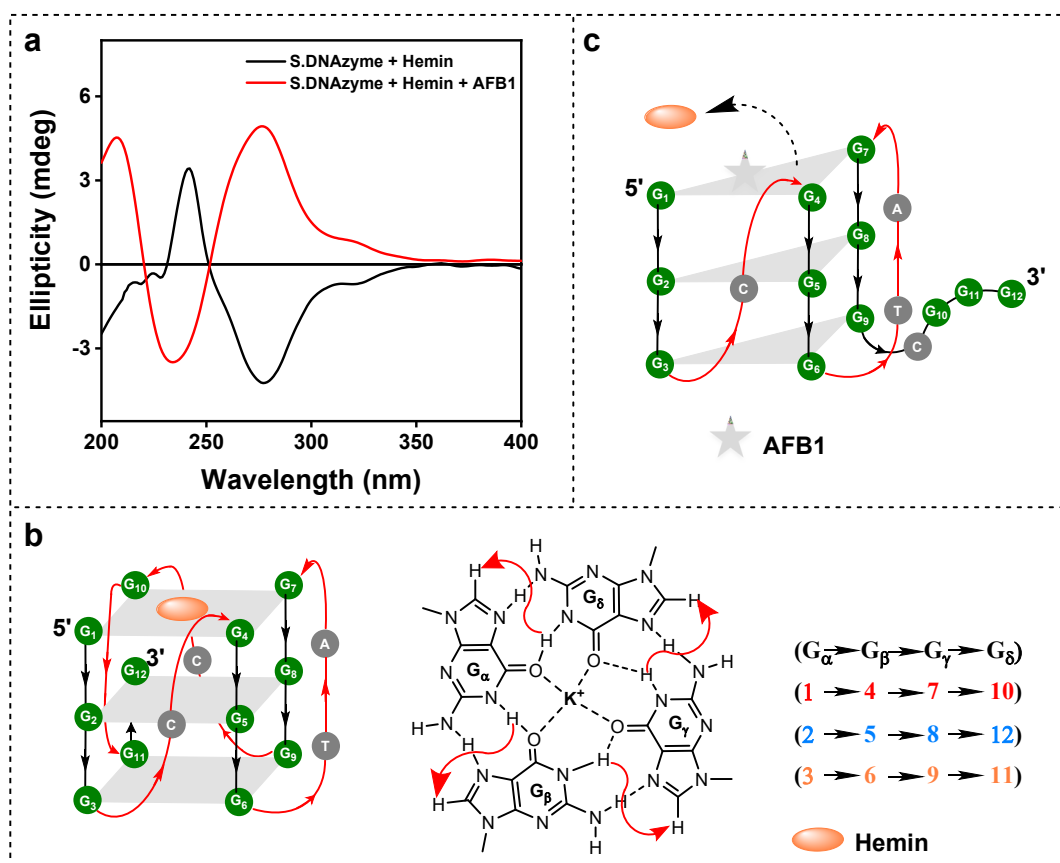

8  
9  
10  
11

**Fig. S10** (a) Circular dichroism spectra of S.DNAzyme with hemin (black) and S.DNAzyme with hemin with AFB1 (red). Schematics of the structure of S.DNAzyme with (b) hemin and (c) hemin and AFB1.



1  
2

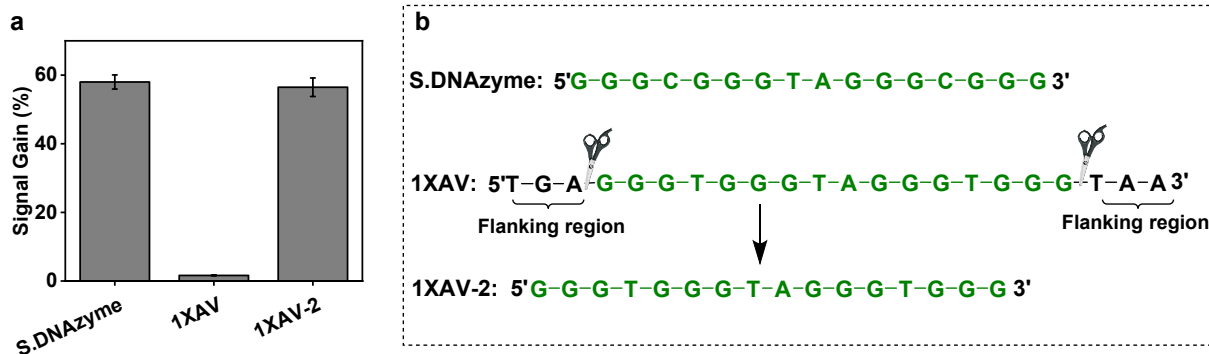

3  
4  
5  
6  
7  
8

**Fig. S11** (left) Signal gain and (right) sequences of AFB1 detection using S.DNAzyme, 1XAV and 1XAV-2.

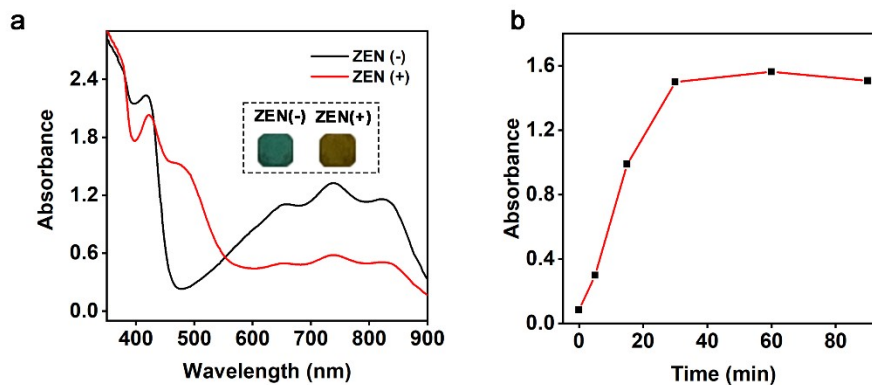

9  
10  
11  
12  
13  
14  
15  
16

**Fig. S12** (a) UV-VIS absorption spectra of the reaction solution without ZEN (ZEN (-)) and with ZEN (ZEN (+)), the illustration is the true color of solution after reaction for 15 minutes. (b) Absorbance changes at 472nm during 0 to 90 min.

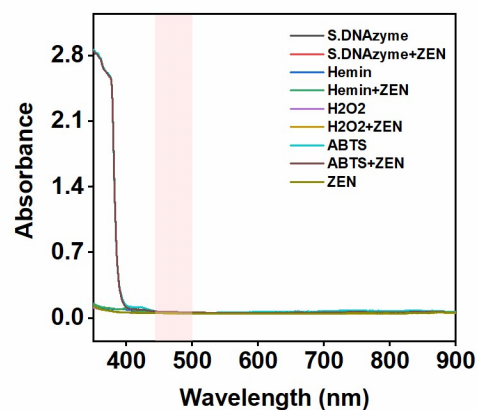

1  
2 **Fig. 13** The UV-VIS absorbance spectra of different solutions.

3  
4  
5

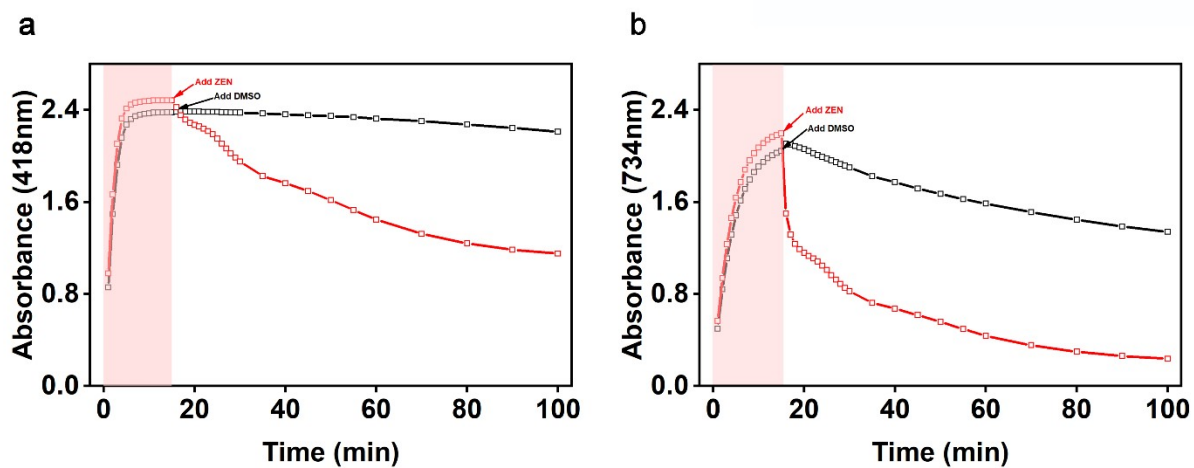

6  
7 **Fig. S14** Time-course absorbance of samples at (a) 418 nm and (b) 734 nm after adding ZEN or DMSO at 15  
8 min. DMSO was used as control and was added to the blank solution.

9  
10  
11

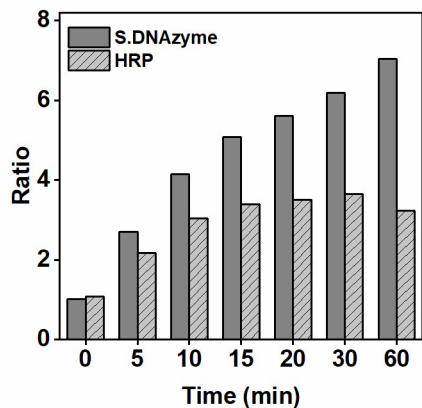

1

2 **Fig. S15** The ratio change of ZEN detection at different time using S.DNAzyme and HRP. The ratio was  
 3 calculated as follows: Ratio = absorbance value of experiment/ absorbance value of blank.

4

5

6

7

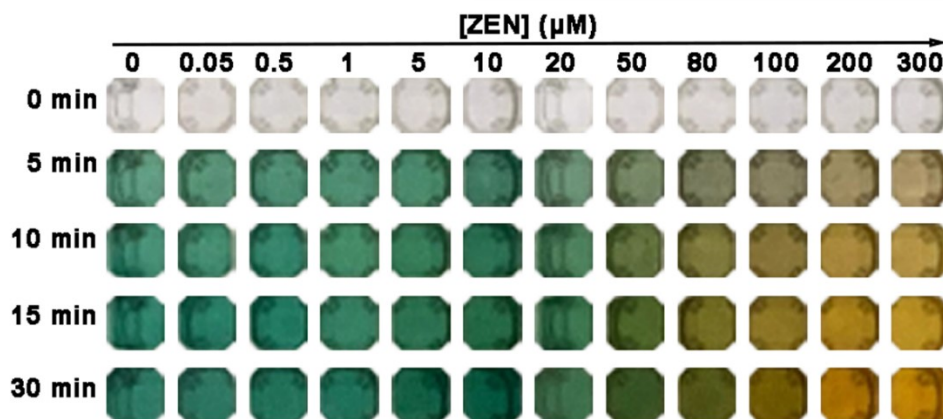

8

9 **Fig. S16** The time course visual detection of ZEN using S.DNAzyme. Photographs of the samples containing  
 10 different concentrations of ZEN (0-300 μM) at different time.

11

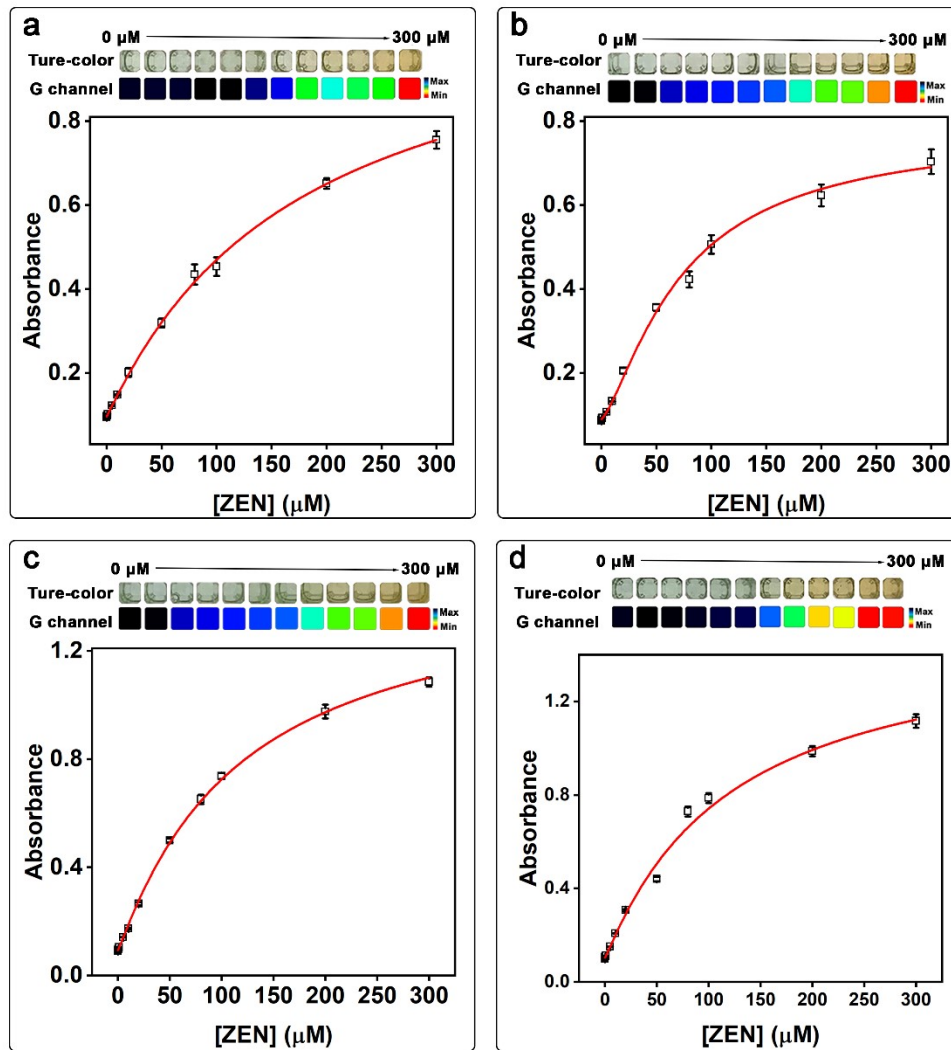

1

2 **Fig. S17** Calibration curves of ZEN in real samples including (a) fritillariae cirrhosae bulbus, (b) angelica  
 3 sinensis, (c) amygdalin and (d) rice.

4

5

6

## 1 References

- 2 1 J. Wu, L. Zeng, N. Li, C. Liu and J. Chen, *Food Chem.*, 2019, **298**, 125034.
- 3 2 P. Vijitvarasan, S. Cheunkar and S. Oaew, *Food Control.*, 2022, **134**, 108767.
- 4 3 X. Zhang, X. Wang, M. Sun, X. Zhang, H. Song, Y. Yan, J. Sun, X. Li and W. Fang, *Toxins.*, 2015, **7(10)**,  
5 4216-4231.
- 6 4 G. Liu, Z. Han, D. Nie, J. Yang, Z. Zhao, J. Zhang, H. Li, Y. Liao, S. Song, S. De Saeger and A. Wu,  
7 *Food Control.*, 2012, **27(1)**, 200-205.
- 8 5 X. Li, P. Li, Q. Zhang, R. Li, W. Zhang, Z. Zhang, X. Ding and X. Tang, *Biosens. Bioelectron.*, 2013, **49**,  
9 426-432.
- 10 6 Y. Wu, Y. Zhou, H. Huang, X. Chen, Y. Leng, W. Lai, X. Huang and Y. Xiong, *Sens. Actuators.*, 2020,  
11 **316**, 128107.
- 12 7 S. Sun, R. Zhao, S. Feng and Y. Xie, *Mikrochim Acta.*, 2018, **185(12)**, 1-7.
